# Supplementary material for: Temporal variability in zooplankton community in the western Yellow Sea and its possible links to green tides
Source: PubMed Central journal article supplement (PMC6459317; doi:10.7717/peerj.6641), 2019-04-08

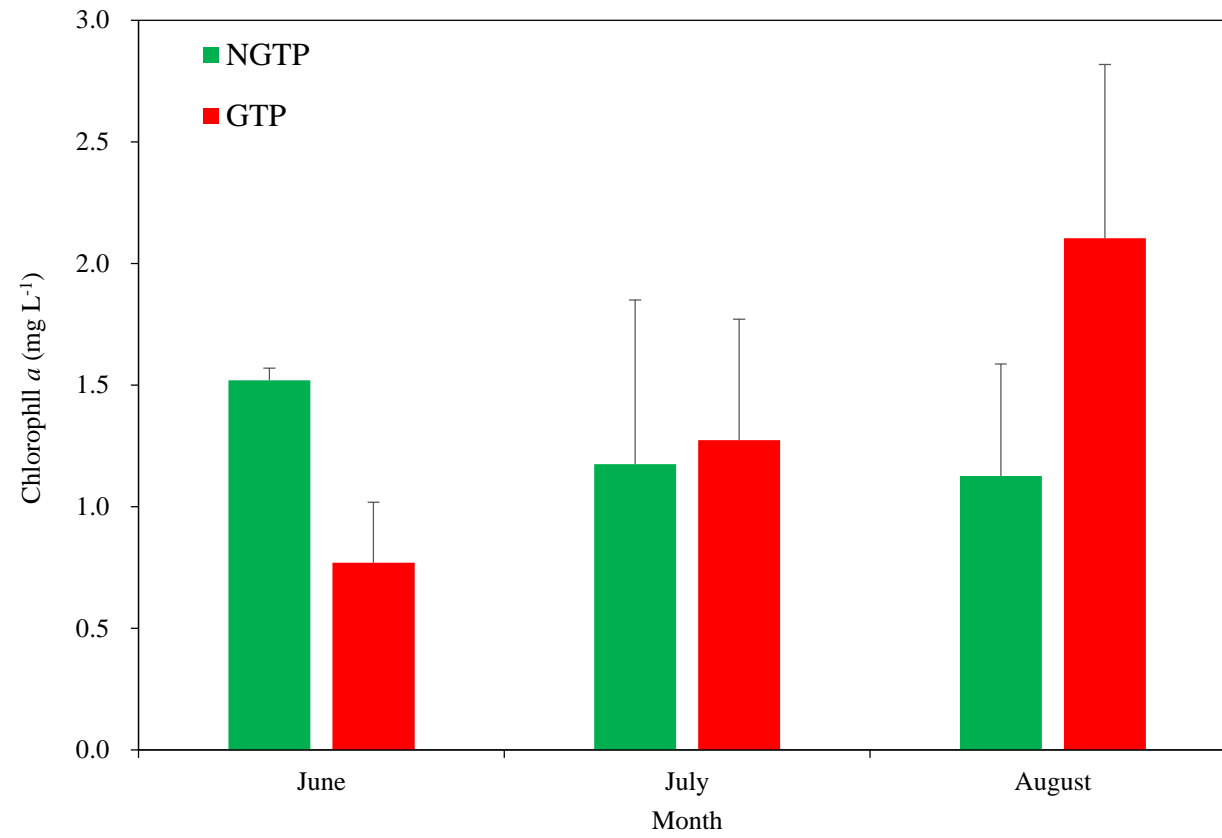

Supplement: peerj-07-6641-s001.pdf [file peerj-07-6641-s001.pdf]
